# Supplementary material for: Effectiveness of the Home Based Life Saving Skills training by community health workers on knowledge of danger signs, birth preparedness, complication readiness and facility delivery, among women in Rural Tanzania
Source: Springer Nature journal article supplement (doi:10.1186/s12884-016-0916-x), 2016-06-02
Supplement: MOESM1 [file 10243802]

Questionnaire for Home Based Life Saving Skills

**PART 1: SOCIO DEMOGRAPHIC CHARACTERISTICS.**

| Q # | Question                                                                 | CODES                                                                                                                                                                                                                                                                                                                                             |
|-----|--------------------------------------------------------------------------|---------------------------------------------------------------------------------------------------------------------------------------------------------------------------------------------------------------------------------------------------------------------------------------------------------------------------------------------------|
| 1.  | How old are you now                                                      | AGE IN COMPLETED YEARS... <input type="text"/>                                                                                                                                                                                                                                                                                                    |
| 2.  | Have you ever attended school?                                           | YES.....1<br>NO.....2                                                                                                                                                                                                                                                                                                                             |
| 3.  | What is the highest grade you have completed?                            | NO SCHOOL.....1<br>NOT COMPLETED PRIMARY SCHOOL.....2<br>COMPLETED PRIMARY SCHOOL.....3<br>NOT COMPLETED SECONDARY SCHOOL.....4<br>COMPLETED SECONDARY SCHOOL.....5<br>UNIVERSITY.....6<br>MADRAS.....7<br>OTHER.....97<br>(SPECIFY)                                                                                                              |
| 4.  | What is your marital status now?                                         | SINGLE.....1<br>MARRIED/IN UNION.....2<br>WIDOWED.....3<br>DIVORCED.....4<br>SEPARATED.....5                                                                                                                                                                                                                                                      |
| 5.  | What is the main material of the floor<br><br>Record observation         | NATURAL FLOOR<br>EARTH/SAND .....11<br>DUNG.....12<br>RUDIMENTARY FLOOR<br>WOOD PLANKS.....21<br>PALM/BAMBOO .....22<br>FINISHED FLOOR<br>PARQUET OR<br>POLISHED WOOD.....31<br>VINYL OR<br>ASPHALT STRIPS.....32<br>CERAMIC TILES.....33<br>CEMENT.....34<br>CARPET.....35<br>OTHER.....97<br>(SPECIFY)                                          |
| 6.  | What is the main source of drinking water for members of your household? | PIPED WATER<br>PIPED INTO DWELLING .....11<br>PIPED INTO YARD/PLOT.....12<br>PUBLIC TAP .....13<br>WATER FROM OPEN WELL<br>OPEN WELL IN YARD/PLOT .....21<br>OPEN PUBLIC WELL .....22<br>WATER FROM COVERED WELL PROTECTED WELL IN<br>YARD/PLOT .....31<br>PROTECTED PUBLIC WELL .....32<br>SURFACE WATER<br>SPRING.....41<br>RIVER/STREAM.....42 |

|                                |                                                                                                                     | <b>POND/LAKE.....43</b><br><b>DAM.....44</b><br><b>RAINWATER .....51</b><br><b>TANKER TRUCK.....61</b><br><b>BOTTLED WATER .....71</b>                                                                                                                                                                                                                                                                                                                                                                                                                                                                                                                                                                                                                                                                                                                                                                                                                                                                                                                                                                                                                                                                                             |  |     |    |                    |               |          |                        |               |          |                      |               |          |                                |               |          |                       |               |          |                     |               |          |                                |               |          |
|--------------------------------|---------------------------------------------------------------------------------------------------------------------|------------------------------------------------------------------------------------------------------------------------------------------------------------------------------------------------------------------------------------------------------------------------------------------------------------------------------------------------------------------------------------------------------------------------------------------------------------------------------------------------------------------------------------------------------------------------------------------------------------------------------------------------------------------------------------------------------------------------------------------------------------------------------------------------------------------------------------------------------------------------------------------------------------------------------------------------------------------------------------------------------------------------------------------------------------------------------------------------------------------------------------------------------------------------------------------------------------------------------------|--|-----|----|--------------------|---------------|----------|------------------------|---------------|----------|----------------------|---------------|----------|--------------------------------|---------------|----------|-----------------------|---------------|----------|---------------------|---------------|----------|--------------------------------|---------------|----------|
| 7.                             | What type of fuel do you mainly use for cooking in your household?                                                  | <b>ELECTRICITY.....01</b><br><b>LPG/NATURAL GAS.....02</b><br><b>BIOGAS.....03</b><br><b>KEROSENE.....04</b><br><b>CHARCOAL.....05</b><br><b>FIREWOOD, STRAW .....06</b><br><b>DUNG.....07</b><br><br><b>OTHER _____ 97</b><br><b>(SPECIFY)</b>                                                                                                                                                                                                                                                                                                                                                                                                                                                                                                                                                                                                                                                                                                                                                                                                                                                                                                                                                                                    |  |     |    |                    |               |          |                        |               |          |                      |               |          |                                |               |          |                       |               |          |                     |               |          |                                |               |          |
| 8.                             | Does any member of your household own:                                                                              | <table style="width: 100%; border-collapse: collapse;"> <thead> <tr> <th></th> <th style="text-align: center;">YES</th> <th style="text-align: center;">NO</th> </tr> </thead> <tbody> <tr> <td><b>RADIO. ....</b></td> <td style="text-align: center;"><b>1.....</b></td> <td style="text-align: center;"><b>2</b></td> </tr> <tr> <td><b>CELL PHONE.....</b></td> <td style="text-align: center;"><b>1.....</b></td> <td style="text-align: center;"><b>2</b></td> </tr> <tr> <td><b>BICYCLE .....</b></td> <td style="text-align: center;"><b>1.....</b></td> <td style="text-align: center;"><b>2</b></td> </tr> <tr> <td><b>MOTORCYCLE/SCOOTER.....</b></td> <td style="text-align: center;"><b>1.....</b></td> <td style="text-align: center;"><b>2</b></td> </tr> <tr> <td><b>CAR/TRUCK.....</b></td> <td style="text-align: center;"><b>1.....</b></td> <td style="text-align: center;"><b>2</b></td> </tr> <tr> <td><b>TRACTOR.....</b></td> <td style="text-align: center;"><b>1.....</b></td> <td style="text-align: center;"><b>2</b></td> </tr> <tr> <td><b>ANIMAL-DRAWN CART .....</b></td> <td style="text-align: center;"><b>1.....</b></td> <td style="text-align: center;"><b>2</b></td> </tr> </tbody> </table> |  | YES | NO | <b>RADIO. ....</b> | <b>1.....</b> | <b>2</b> | <b>CELL PHONE.....</b> | <b>1.....</b> | <b>2</b> | <b>BICYCLE .....</b> | <b>1.....</b> | <b>2</b> | <b>MOTORCYCLE/SCOOTER.....</b> | <b>1.....</b> | <b>2</b> | <b>CAR/TRUCK.....</b> | <b>1.....</b> | <b>2</b> | <b>TRACTOR.....</b> | <b>1.....</b> | <b>2</b> | <b>ANIMAL-DRAWN CART .....</b> | <b>1.....</b> | <b>2</b> |
|                                | YES                                                                                                                 | NO                                                                                                                                                                                                                                                                                                                                                                                                                                                                                                                                                                                                                                                                                                                                                                                                                                                                                                                                                                                                                                                                                                                                                                                                                                 |  |     |    |                    |               |          |                        |               |          |                      |               |          |                                |               |          |                       |               |          |                     |               |          |                                |               |          |
| <b>RADIO. ....</b>             | <b>1.....</b>                                                                                                       | <b>2</b>                                                                                                                                                                                                                                                                                                                                                                                                                                                                                                                                                                                                                                                                                                                                                                                                                                                                                                                                                                                                                                                                                                                                                                                                                           |  |     |    |                    |               |          |                        |               |          |                      |               |          |                                |               |          |                       |               |          |                     |               |          |                                |               |          |
| <b>CELL PHONE.....</b>         | <b>1.....</b>                                                                                                       | <b>2</b>                                                                                                                                                                                                                                                                                                                                                                                                                                                                                                                                                                                                                                                                                                                                                                                                                                                                                                                                                                                                                                                                                                                                                                                                                           |  |     |    |                    |               |          |                        |               |          |                      |               |          |                                |               |          |                       |               |          |                     |               |          |                                |               |          |
| <b>BICYCLE .....</b>           | <b>1.....</b>                                                                                                       | <b>2</b>                                                                                                                                                                                                                                                                                                                                                                                                                                                                                                                                                                                                                                                                                                                                                                                                                                                                                                                                                                                                                                                                                                                                                                                                                           |  |     |    |                    |               |          |                        |               |          |                      |               |          |                                |               |          |                       |               |          |                     |               |          |                                |               |          |
| <b>MOTORCYCLE/SCOOTER.....</b> | <b>1.....</b>                                                                                                       | <b>2</b>                                                                                                                                                                                                                                                                                                                                                                                                                                                                                                                                                                                                                                                                                                                                                                                                                                                                                                                                                                                                                                                                                                                                                                                                                           |  |     |    |                    |               |          |                        |               |          |                      |               |          |                                |               |          |                       |               |          |                     |               |          |                                |               |          |
| <b>CAR/TRUCK.....</b>          | <b>1.....</b>                                                                                                       | <b>2</b>                                                                                                                                                                                                                                                                                                                                                                                                                                                                                                                                                                                                                                                                                                                                                                                                                                                                                                                                                                                                                                                                                                                                                                                                                           |  |     |    |                    |               |          |                        |               |          |                      |               |          |                                |               |          |                       |               |          |                     |               |          |                                |               |          |
| <b>TRACTOR.....</b>            | <b>1.....</b>                                                                                                       | <b>2</b>                                                                                                                                                                                                                                                                                                                                                                                                                                                                                                                                                                                                                                                                                                                                                                                                                                                                                                                                                                                                                                                                                                                                                                                                                           |  |     |    |                    |               |          |                        |               |          |                      |               |          |                                |               |          |                       |               |          |                     |               |          |                                |               |          |
| <b>ANIMAL-DRAWN CART .....</b> | <b>1.....</b>                                                                                                       | <b>2</b>                                                                                                                                                                                                                                                                                                                                                                                                                                                                                                                                                                                                                                                                                                                                                                                                                                                                                                                                                                                                                                                                                                                                                                                                                           |  |     |    |                    |               |          |                        |               |          |                      |               |          |                                |               |          |                       |               |          |                     |               |          |                                |               |          |
| 9.                             | How many children (both live and stillborn) did you give birth to<br>Alive now?                                     | <b>No children yet _____</b><br><br><b>Number of children _____</b><br><br><b>Number alive now?-----</b>                                                                                                                                                                                                                                                                                                                                                                                                                                                                                                                                                                                                                                                                                                                                                                                                                                                                                                                                                                                                                                                                                                                           |  |     |    |                    |               |          |                        |               |          |                      |               |          |                                |               |          |                       |               |          |                     |               |          |                                |               |          |
| 10.                            | Have you ever given birth in the last 24 months, either to a baby that was born alive or a baby that was born dead? | <b>YES.....1</b><br><b>NO.....2</b>                                                                                                                                                                                                                                                                                                                                                                                                                                                                                                                                                                                                                                                                                                                                                                                                                                                                                                                                                                                                                                                                                                                                                                                                |  |     |    |                    |               |          |                        |               |          |                      |               |          |                                |               |          |                       |               |          |                     |               |          |                                |               |          |
| 11.                            | Are you pregnant now?                                                                                               | <b>YES.....1</b><br><b>NO.....2</b>                                                                                                                                                                                                                                                                                                                                                                                                                                                                                                                                                                                                                                                                                                                                                                                                                                                                                                                                                                                                                                                                                                                                                                                                |  |     |    |                    |               |          |                        |               |          |                      |               |          |                                |               |          |                       |               |          |                     |               |          |                                |               |          |
| 12.                            | How many months pregnant are you?                                                                                   | <b>MONTHS.....</b>                                                                                                                                                                                                                                                                                                                                                                                                                                                                                                                                                                                                                                                                                                                                                                                                                                                                                                                                                                                                                                                                                                                                                                                                                 |  |     |    |                    |               |          |                        |               |          |                      |               |          |                                |               |          |                       |               |          |                     |               |          |                                |               |          |
| 13.                            | Is this your first pregnancy                                                                                        | <b>YES.....1</b><br><b>NO.....2</b>                                                                                                                                                                                                                                                                                                                                                                                                                                                                                                                                                                                                                                                                                                                                                                                                                                                                                                                                                                                                                                                                                                                                                                                                |  |     |    |                    |               |          |                        |               |          |                      |               |          |                                |               |          |                       |               |          |                     |               |          |                                |               |          |
| 14.                            | How many times did you attend ANC                                                                                   | <b>Number of ANC visits</b> <input style="width: 50px; height: 20px; border: 1px solid black;" type="text"/>                                                                                                                                                                                                                                                                                                                                                                                                                                                                                                                                                                                                                                                                                                                                                                                                                                                                                                                                                                                                                                                                                                                       |  |     |    |                    |               |          |                        |               |          |                      |               |          |                                |               |          |                       |               |          |                     |               |          |                                |               |          |

**PART 2: KNOWLEDGE**

|     |                                                                                                                                                                                                          |                                                                                                                                                                                                                                                                                                                                                                                                                                                                                                                                                                                                                                                                                                                                                                                                                                                                                                                                                                                                                                                                                                                                                                                                                                                                                                                                                                                                                                                                                                       |
|-----|----------------------------------------------------------------------------------------------------------------------------------------------------------------------------------------------------------|-------------------------------------------------------------------------------------------------------------------------------------------------------------------------------------------------------------------------------------------------------------------------------------------------------------------------------------------------------------------------------------------------------------------------------------------------------------------------------------------------------------------------------------------------------------------------------------------------------------------------------------------------------------------------------------------------------------------------------------------------------------------------------------------------------------------------------------------------------------------------------------------------------------------------------------------------------------------------------------------------------------------------------------------------------------------------------------------------------------------------------------------------------------------------------------------------------------------------------------------------------------------------------------------------------------------------------------------------------------------------------------------------------------------------------------------------------------------------------------------------------|
| 15. | Can unforeseen problems related to pregnancy occur that could endanger life or a woman?                                                                                                                  | <b>YES.....01</b><br><b>NO.....02</b><br><b>DON'T KNOW.....98</b>                                                                                                                                                                                                                                                                                                                                                                                                                                                                                                                                                                                                                                                                                                                                                                                                                                                                                                                                                                                                                                                                                                                                                                                                                                                                                                                                                                                                                                     |
| 16. | What are some serious health problems that can occur during <u>pregnancy</u> , <u>childbirth</u> and <u>postpartum period</u> that could endanger the life of a pregnant woman<br><br>PROBE: Any others? | <b>BLEEDING.....01</b><br><b>SEVERE HEADACHE.....02</b><br><b>BLURRED VISION.....03</b><br><b>CONVULSIONS.....04</b><br><b>SWOLLEN HANDS/FACE.....05</b><br><b>HIGH FEVER.....06</b><br><b>LOSS OF CONSCIOUSNESS.....07</b><br><b>DIFFICULTY BREATHING.....08</b><br><b>SEVERE WEAKNESS.....09</b><br><b>SEVERE ABDOMINAL PAIN.....10</b><br><b>ACCELERATED/REDUCED FETAL MOVEMENT.....11</b><br><b>WATER BREAKS WITHOUT LABOUR.....12</b><br><br><b>OTHER _____ 97</b><br><p style="text-align: center;">(SPECIFY)</p> <b>NONE.....00</b><br><b>DON'T KNOW.....98</b><br><br><b><u>CHILDBIRTH</u></b><br><b>SEVERE BLEEDING.....01</b><br><b>SEVERE HEADACHE.....02</b><br><b>CONVULSIONS.....03</b><br><b>HIGH FEVER.....04</b><br><b>LOSS OF CONSCIOUSNESS.....05</b><br><b>LABOR LASTING&gt;12HOURS.....06</b><br><b>PLACENTA NOT DELIVERED 30 MINUTES AFTER BABY.....07</b><br><br><b>OTHER _____ 97</b><br><p style="text-align: center;">(SPECIFY)</p> <b>NONE.....00</b><br><b>DON'T KNOW.....98</b><br><br><b><u>POSTPARTUM</u></b><br><b>SEVERE BLEEDING.....01</b><br><b>SEVERE HEADACHE.....02</b><br><b>CONVULSIONS.....03</b><br><b>HIGH FEVER.....04</b><br><b>LOSS OF CONSCIOUSNESS.....05</b><br><b>LABOR LASTING&gt;12HOURS.....06</b><br><b>MALODOROUS VAGINAL DISCHARGE.....07</b><br><b>DIFFICULTY BREATHING.....08</b><br><b>SEVERE WEAKNESS.....09</b><br><b>OTHER _____ 97</b><br><p style="text-align: center;">(SPECIFY)</p> <b>NONE.....00</b><br><b>DON'T KNOW.....98</b> |

|     |                                                                                                                                                              |                                                                                                                                                                                                                                                                                                                                                                                                                                                                                                                                      |         |         |          |          |
|-----|--------------------------------------------------------------------------------------------------------------------------------------------------------------|--------------------------------------------------------------------------------------------------------------------------------------------------------------------------------------------------------------------------------------------------------------------------------------------------------------------------------------------------------------------------------------------------------------------------------------------------------------------------------------------------------------------------------------|---------|---------|----------|----------|
| 17. | In your opinion, what are some serious problems that can occur <u>during the first 7 days after birth</u> that could endanger the life of the new born baby? | <b>DIFFICULT OR FAST BREATHING.....01</b><br><b>YELLOW SKIN/EYE COLOR (JAUNDICE).....02</b><br><b>POOR SUCKING OR FEEDING.....03</b><br><b>PUS, BLEEDING OR DISCHARGE FROM THE UMBILICAL CORD.....04</b><br><b>BABY VERY SMALL.....05</b><br><b>SKIN LESIONS OR BLISTERS.....06</b><br><b>CONVULSIONS/SPASMS/RIGIDITY.....07</b><br><b>ABDOMINAL PAIN/FULLNESS.....08</b><br><b>FAILURE TO PASS STOOL.....09</b><br><b>FEVER.....10</b><br><b>OTHER.....97</b><br><b>(SPECIFY)</b><br><b>DON'T KNOW.....00</b><br><b>NONE.....98</b> |         |         |          |          |
| 18. | Have you ever heard the term 'birth preparedness'?                                                                                                           | <b>YES.....1</b><br><b>NO.....2</b>                                                                                                                                                                                                                                                                                                                                                                                                                                                                                                  |         |         |          |          |
| 19. | In your opinion, what are some things a woman/family can do to prepare for birth?                                                                            | <b>IDENTIFY MODE OF TRANSPORT.....01</b><br><b>SAVE MONEY (for emergencies).....02</b><br><b>IDENTIFY BLOOD DONOR .....03</b><br><b>IDENTIFY SKILLED PROVIDER.....04</b><br><b>IDENTIFY WHERE TO GO.....05</b><br><b>BIRTH KIT.....06</b><br><b>OTHER _____ 97</b><br><b>(SPECIFY)</b>                                                                                                                                                                                                                                               |         |         |          |          |
| 20. | In your community, which is the commonest mean of transportation to use to go to your nearest health facility<br><br>PROBE:                                  | <b>AMBULANCE.....01</b><br><b>PRIVATE CAR.....02</b><br><b>TAX/BUS.....03</b><br><b>CART.....04</b><br><b>MOTORBIKE.....05</b><br><b>ON FOOT.....06</b><br><b>BICYCLE.....07</b><br><b>OTHER _____ 97</b><br><b>(SPECIFY)</b><br><b>DON'T KNOW.....98</b>                                                                                                                                                                                                                                                                            |         |         |          |          |
| 21. | In general, how long would it take to reach this health facility?                                                                                            | <b>HOURS.....</b> <input type="text"/><br><b>MINUTES.....</b> <input type="text"/><br><b>DON'T KNOW.....98</b>                                                                                                                                                                                                                                                                                                                                                                                                                       |         |         |          |          |
| 22. | <b><u>ATTITUDES AND PERCEPTION</u></b><br>A woman should plan ahead of time where she will give birth to hear baby                                           | SA<br>01                                                                                                                                                                                                                                                                                                                                                                                                                                                                                                                             | A<br>02 | D<br>03 | SD<br>04 | DK<br>05 |

|     |                                                                                           |                  |                 |                 |                  |                  |
|-----|-------------------------------------------------------------------------------------------|------------------|-----------------|-----------------|------------------|------------------|
|     |                                                                                           |                  |                 |                 |                  |                  |
| 23. | A woman should plan ahead of time how she will get to the place where she will give birth | <b>SA<br/>01</b> | <b>A<br/>02</b> | <b>D<br/>03</b> | <b>SD<br/>04</b> | <b>DK<br/>05</b> |
| 24. | It is not necessary for a husband /partner to accompany his wife to antenatal care visits | <b>SA<br/>01</b> | <b>A<br/>02</b> | <b>D<br/>03</b> | <b>SD<br/>04</b> | <b>DK<br/>05</b> |
| 25. | It is not necessary for a husband to accompany his wife when she is giving birth          | <b>SA<br/>01</b> | <b>A<br/>02</b> | <b>D<br/>03</b> | <b>SD<br/>04</b> | <b>DK<br/>05</b> |
| 26. | Giving birth is mostly woman's matter. Husbands have little to contribute                 | <b>SA<br/>01</b> | <b>A<br/>02</b> | <b>D<br/>03</b> | <b>SD<br/>04</b> | <b>DK<br/>05</b> |

**PART 3: PERSONAL EXPERIENCE RELATED TO THIS OR THE LAST PREGNANCY.**

| Q. # | QUESTION                                                                                                                                                                                                                      | CODES                                                                                                                                                                                                                                                                                                                                                                                             |
|------|-------------------------------------------------------------------------------------------------------------------------------------------------------------------------------------------------------------------------------|---------------------------------------------------------------------------------------------------------------------------------------------------------------------------------------------------------------------------------------------------------------------------------------------------------------------------------------------------------------------------------------------------|
| 27.  | <p>During this or the last pregnancy, did a health worker advise you about any of the following at least once?</p>                                                                                                            | <p style="text-align: center;">YES      NO      DK</p> <p><b>DANGER SIGNS.....01.....02.....98</b></p> <p><b>WHERE TO GO .....01.....02.....98</b></p> <p><b>WHERE TO GIVE BIRTH.....01.....02.....98</b></p> <p><b>TRANSPORT .....01.....02.....98</b></p> <p><b>MONEY .....01.....02.....98</b></p> <p><b>BLOOD DONOR.....01.....02.....98</b></p> <p><b>BIRTH KIT.....01.....02.....98</b></p> |
| 28.  | <p>Did you speak with anyone, outside of a health facility about danger signs of serious health problems during pregnancy, childbirth, or soon after?</p> <p>IF YES: Who did you speak with?</p> <p>RECORD ALL RESPONSES.</p> | <p style="text-align: center;">YES      NO      DK</p> <p><b>DANGER SIGNS.....01.....02.....98</b></p> <p><b>HUSBAND .....01</b></p> <p><b>MOTHER-IN-LAW.....02</b></p> <p><b>OTHER FAMILY MEMBER.....03</b></p> <p><b>FRIEND/NEIGHBOR.....04</b></p> <p><b>COMMUNITY HEALTH WORKER.....05</b></p>                                                                                                |
| 29.  | <p>Did you speak with anyone outside of a health facility about danger signs of serious health problems for your baby</p> <p>IF YES: Who did you speak with?</p> <p>RECORD ALL RESPONSES.</p>                                 | <p style="text-align: center;">YES      NO      DK</p> <p><b>DANGER SIGNS.....01.....02.....98</b></p> <p><b>HUSBAND .....01</b></p> <p><b>MOTHER-IN-LAW.....02</b></p> <p><b>OTHER FAMILY MEMBER.....03</b></p> <p><b>FRIEND/NEIGHBOR.....04</b></p> <p><b>COMMUNITY HEALTH WORKER.....05</b></p>                                                                                                |



|     |                                                                                                                                                                                                          |                                                                                                                                                                                                                                                                                                                                                                                                                                                                                                                                      |
|-----|----------------------------------------------------------------------------------------------------------------------------------------------------------------------------------------------------------|--------------------------------------------------------------------------------------------------------------------------------------------------------------------------------------------------------------------------------------------------------------------------------------------------------------------------------------------------------------------------------------------------------------------------------------------------------------------------------------------------------------------------------------|
| 31. | <p>Did you speak with anyone outside of a health facility about arrangement for a healthcare professional to deliver your child?</p> <p>IF YES: Who did you speak with?</p> <p>RECORD ALL RESPONSES.</p> | <p style="text-align: center;">YES    NO    DK</p> <p><b>SKILLED PROVIDER .....01.....02.....98</b><br/> <b>HUSBAND.....01</b><br/> <b>MOTHER-IN-LAW.....02</b><br/> <b>OTHER FAMILY MEMBER.....03</b><br/> <b>FRIEND/NEIGHBOR.....04</b><br/> <b>COMMUNITY HEALTH WORKER.....05</b></p>                                                                                                                                                                                                                                             |
| 32. | <p>Have you or your family made any arrangements for the birth of this child?</p>                                                                                                                        | <p><b>YES.....01</b><br/> <b>NO.....02</b><br/> <b>DON'T KNOW.....98</b></p>                                                                                                                                                                                                                                                                                                                                                                                                                                                         |
| 33. | <p>Which arrangements have you or your family made for the birth of this child?</p>                                                                                                                      | <p style="text-align: center;"><b>UNPROMPTED    PROMPTED</b></p> <p><b>IDENTIFY</b><br/> <b>TRANSPORT.....01.....01</b><br/> <b>SAVE MONEY.....02.....02</b><br/> <b>IDENTIFY BLOOD</b><br/> <b>DONOR.....03.....03</b><br/> <b>IDENTIFY SKILLED</b><br/> <b>PROVIDER.....04.....04</b><br/> <b>IDENTIFY WHERE TO GO...05.....05</b><br/> <b>BIRTH KIT.....06.....06</b></p> <p><b>OTHER _____ 97</b><br/> <b>(SPECIFY)</b></p>                                                                                                      |
| 34. | <p>Where do you plan to give birth to this baby?</p>                                                                                                                                                     | <p><b>HOME</b><br/> <b>RESPONDENT'S HOME.....11</b><br/> <b>TBA'S HOME.....12</b><br/> <b>OTHER HOME.....13</b></p> <p><b>PUBLIC SECTOR</b><br/> <b>GVT. HOSPITAL.....21</b><br/> <b>GVT. HEALTH CENTER.....22</b><br/> <b>GVT. DISPENSARY.....23</b><br/> <b>OTHERPUBLIC _____ 26</b><br/> <b>(SPECIFY)</b></p> <p><b>PRIVATE SECTOR</b><br/> <b>PVT. HOSPITAL.....31</b><br/> <b>MATERNITY/NURSING HOME.....32</b><br/> <b>OTHER PRIVATE _____ 36</b><br/> <b>(SPECIFY)</b></p> <p><b>OTHER _____ 97</b><br/> <b>(SPECIFY)</b></p> |



**PART 4: EXPERIENCE RELATED TO THIS OR THE LAST PREGNANCY**

| Q. #                                            | QUESTION                                                                                                                             | CODES                                                                                                                                                                                                                                                                                                                                                                                                                                                                                                                                                                                                                                                                                                                                                                                                                                                                                                                                                                                                                                                                                                                                                                                                                                                                                                                                                                                                                                                                                                                                                                                                                                                                                                                                                                                                                                                                                                                                                                                                                                                                                                                                                                                           |                      |            |                            |                       |                                 |     |                              |     |                           |                             |           |     |                          |     |                            |                                 |                                     |     |                            |     |           |                                    |                    |     |                                   |     |     |                              |     |     |                                    |     |     |                                                 |     |     |                                         |     |     |                    |  |    |           |  |  |                         |  |     |
|-------------------------------------------------|--------------------------------------------------------------------------------------------------------------------------------------|-------------------------------------------------------------------------------------------------------------------------------------------------------------------------------------------------------------------------------------------------------------------------------------------------------------------------------------------------------------------------------------------------------------------------------------------------------------------------------------------------------------------------------------------------------------------------------------------------------------------------------------------------------------------------------------------------------------------------------------------------------------------------------------------------------------------------------------------------------------------------------------------------------------------------------------------------------------------------------------------------------------------------------------------------------------------------------------------------------------------------------------------------------------------------------------------------------------------------------------------------------------------------------------------------------------------------------------------------------------------------------------------------------------------------------------------------------------------------------------------------------------------------------------------------------------------------------------------------------------------------------------------------------------------------------------------------------------------------------------------------------------------------------------------------------------------------------------------------------------------------------------------------------------------------------------------------------------------------------------------------------------------------------------------------------------------------------------------------------------------------------------------------------------------------------------------------|----------------------|------------|----------------------------|-----------------------|---------------------------------|-----|------------------------------|-----|---------------------------|-----------------------------|-----------|-----|--------------------------|-----|----------------------------|---------------------------------|-------------------------------------|-----|----------------------------|-----|-----------|------------------------------------|--------------------|-----|-----------------------------------|-----|-----|------------------------------|-----|-----|------------------------------------|-----|-----|-------------------------------------------------|-----|-----|-----------------------------------------|-----|-----|--------------------|--|----|-----------|--|--|-------------------------|--|-----|
| 35.                                             | During this or the last pregnancy, did you experience any serious health problems related to the pregnancy?                          | <b>YES</b> .....01<br><b>NO</b> .....02<br><b>DON'T KNOW</b> .....98                                                                                                                                                                                                                                                                                                                                                                                                                                                                                                                                                                                                                                                                                                                                                                                                                                                                                                                                                                                                                                                                                                                                                                                                                                                                                                                                                                                                                                                                                                                                                                                                                                                                                                                                                                                                                                                                                                                                                                                                                                                                                                                            |                      |            |                            |                       |                                 |     |                              |     |                           |                             |           |     |                          |     |                            |                                 |                                     |     |                            |     |           |                                    |                    |     |                                   |     |     |                              |     |     |                                    |     |     |                                                 |     |     |                                         |     |     |                    |  |    |           |  |  |                         |  |     |
| 36.                                             | What problems did you experience? (CIRCLE ALL RESPONSES GIVEN).<br><br>THEN PROBE: Did you experience (ANY REMAINING COMPLICATIONS)? | <table style="width: 100%; border-collapse: collapse;"> <thead> <tr> <th style="width: 50%;"></th> <th style="text-align: center; width: 25%;">UNPROMPTED</th> <th style="text-align: center; width: 25%;">PROMPTED</th> </tr> </thead> <tbody> <tr> <td><b>BLEEDING</b>.....</td> <td style="text-align: center;">.01</td> <td style="text-align: center;">.01</td> </tr> <tr> <td><b>SEVERE HEADACHE</b>.....</td> <td style="text-align: center;">.02</td> <td style="text-align: center;">.02</td> </tr> <tr> <td><b>BLURRED VISION</b>.....</td> <td style="text-align: center;">.03</td> <td style="text-align: center;">.03</td> </tr> <tr> <td><b>CONVULSIONS</b>.....</td> <td style="text-align: center;">.04</td> <td style="text-align: center;">.04</td> </tr> <tr> <td><b>SWOLLEN HANDS/FACE</b>.....</td> <td style="text-align: center;">.05</td> <td style="text-align: center;">.05</td> </tr> <tr> <td><b>HIGH FEVER</b>.....</td> <td style="text-align: center;">.06</td> <td style="text-align: center;">.06</td> </tr> <tr> <td><b>LOSS OF CONSCIOUSNESS</b>.....</td> <td style="text-align: center;">.07</td> <td style="text-align: center;">.07</td> </tr> <tr> <td><b>DIFFICULTY BREATHING</b>.....</td> <td style="text-align: center;">.08</td> <td style="text-align: center;">.08</td> </tr> <tr> <td><b>SEVERE WEAKNESS</b>.....</td> <td style="text-align: center;">.09</td> <td style="text-align: center;">.09</td> </tr> <tr> <td><b>SEVERE ABDOMINAL PAIN</b>.....</td> <td style="text-align: center;">.10</td> <td style="text-align: center;">.10</td> </tr> <tr> <td><b>ACCELERATED/REDUCED FETAL MOVEMENT</b>.....</td> <td style="text-align: center;">.11</td> <td style="text-align: center;">.11</td> </tr> <tr> <td><b>WATER BREAKS WITHOUT LABOR</b>.....</td> <td style="text-align: center;">.12</td> <td style="text-align: center;">.12</td> </tr> <tr> <td><b>OTHER</b> _____</td> <td></td> <td style="text-align: center;">97</td> </tr> <tr> <td style="text-align: center;">(SPECIFY)</td> <td></td> <td></td> </tr> <tr> <td><b>DON'T KNOW</b>.....</td> <td></td> <td style="text-align: center;">.98</td> </tr> </tbody> </table> |                      | UNPROMPTED | PROMPTED                   | <b>BLEEDING</b> ..... | .01                             | .01 | <b>SEVERE HEADACHE</b> ..... | .02 | .02                       | <b>BLURRED VISION</b> ..... | .03       | .03 | <b>CONVULSIONS</b> ..... | .04 | .04                        | <b>SWOLLEN HANDS/FACE</b> ..... | .05                                 | .05 | <b>HIGH FEVER</b> .....    | .06 | .06       | <b>LOSS OF CONSCIOUSNESS</b> ..... | .07                | .07 | <b>DIFFICULTY BREATHING</b> ..... | .08 | .08 | <b>SEVERE WEAKNESS</b> ..... | .09 | .09 | <b>SEVERE ABDOMINAL PAIN</b> ..... | .10 | .10 | <b>ACCELERATED/REDUCED FETAL MOVEMENT</b> ..... | .11 | .11 | <b>WATER BREAKS WITHOUT LABOR</b> ..... | .12 | .12 | <b>OTHER</b> _____ |  | 97 | (SPECIFY) |  |  | <b>DON'T KNOW</b> ..... |  | .98 |
|                                                 | UNPROMPTED                                                                                                                           | PROMPTED                                                                                                                                                                                                                                                                                                                                                                                                                                                                                                                                                                                                                                                                                                                                                                                                                                                                                                                                                                                                                                                                                                                                                                                                                                                                                                                                                                                                                                                                                                                                                                                                                                                                                                                                                                                                                                                                                                                                                                                                                                                                                                                                                                                        |                      |            |                            |                       |                                 |     |                              |     |                           |                             |           |     |                          |     |                            |                                 |                                     |     |                            |     |           |                                    |                    |     |                                   |     |     |                              |     |     |                                    |     |     |                                                 |     |     |                                         |     |     |                    |  |    |           |  |  |                         |  |     |
| <b>BLEEDING</b> .....                           | .01                                                                                                                                  | .01                                                                                                                                                                                                                                                                                                                                                                                                                                                                                                                                                                                                                                                                                                                                                                                                                                                                                                                                                                                                                                                                                                                                                                                                                                                                                                                                                                                                                                                                                                                                                                                                                                                                                                                                                                                                                                                                                                                                                                                                                                                                                                                                                                                             |                      |            |                            |                       |                                 |     |                              |     |                           |                             |           |     |                          |     |                            |                                 |                                     |     |                            |     |           |                                    |                    |     |                                   |     |     |                              |     |     |                                    |     |     |                                                 |     |     |                                         |     |     |                    |  |    |           |  |  |                         |  |     |
| <b>SEVERE HEADACHE</b> .....                    | .02                                                                                                                                  | .02                                                                                                                                                                                                                                                                                                                                                                                                                                                                                                                                                                                                                                                                                                                                                                                                                                                                                                                                                                                                                                                                                                                                                                                                                                                                                                                                                                                                                                                                                                                                                                                                                                                                                                                                                                                                                                                                                                                                                                                                                                                                                                                                                                                             |                      |            |                            |                       |                                 |     |                              |     |                           |                             |           |     |                          |     |                            |                                 |                                     |     |                            |     |           |                                    |                    |     |                                   |     |     |                              |     |     |                                    |     |     |                                                 |     |     |                                         |     |     |                    |  |    |           |  |  |                         |  |     |
| <b>BLURRED VISION</b> .....                     | .03                                                                                                                                  | .03                                                                                                                                                                                                                                                                                                                                                                                                                                                                                                                                                                                                                                                                                                                                                                                                                                                                                                                                                                                                                                                                                                                                                                                                                                                                                                                                                                                                                                                                                                                                                                                                                                                                                                                                                                                                                                                                                                                                                                                                                                                                                                                                                                                             |                      |            |                            |                       |                                 |     |                              |     |                           |                             |           |     |                          |     |                            |                                 |                                     |     |                            |     |           |                                    |                    |     |                                   |     |     |                              |     |     |                                    |     |     |                                                 |     |     |                                         |     |     |                    |  |    |           |  |  |                         |  |     |
| <b>CONVULSIONS</b> .....                        | .04                                                                                                                                  | .04                                                                                                                                                                                                                                                                                                                                                                                                                                                                                                                                                                                                                                                                                                                                                                                                                                                                                                                                                                                                                                                                                                                                                                                                                                                                                                                                                                                                                                                                                                                                                                                                                                                                                                                                                                                                                                                                                                                                                                                                                                                                                                                                                                                             |                      |            |                            |                       |                                 |     |                              |     |                           |                             |           |     |                          |     |                            |                                 |                                     |     |                            |     |           |                                    |                    |     |                                   |     |     |                              |     |     |                                    |     |     |                                                 |     |     |                                         |     |     |                    |  |    |           |  |  |                         |  |     |
| <b>SWOLLEN HANDS/FACE</b> .....                 | .05                                                                                                                                  | .05                                                                                                                                                                                                                                                                                                                                                                                                                                                                                                                                                                                                                                                                                                                                                                                                                                                                                                                                                                                                                                                                                                                                                                                                                                                                                                                                                                                                                                                                                                                                                                                                                                                                                                                                                                                                                                                                                                                                                                                                                                                                                                                                                                                             |                      |            |                            |                       |                                 |     |                              |     |                           |                             |           |     |                          |     |                            |                                 |                                     |     |                            |     |           |                                    |                    |     |                                   |     |     |                              |     |     |                                    |     |     |                                                 |     |     |                                         |     |     |                    |  |    |           |  |  |                         |  |     |
| <b>HIGH FEVER</b> .....                         | .06                                                                                                                                  | .06                                                                                                                                                                                                                                                                                                                                                                                                                                                                                                                                                                                                                                                                                                                                                                                                                                                                                                                                                                                                                                                                                                                                                                                                                                                                                                                                                                                                                                                                                                                                                                                                                                                                                                                                                                                                                                                                                                                                                                                                                                                                                                                                                                                             |                      |            |                            |                       |                                 |     |                              |     |                           |                             |           |     |                          |     |                            |                                 |                                     |     |                            |     |           |                                    |                    |     |                                   |     |     |                              |     |     |                                    |     |     |                                                 |     |     |                                         |     |     |                    |  |    |           |  |  |                         |  |     |
| <b>LOSS OF CONSCIOUSNESS</b> .....              | .07                                                                                                                                  | .07                                                                                                                                                                                                                                                                                                                                                                                                                                                                                                                                                                                                                                                                                                                                                                                                                                                                                                                                                                                                                                                                                                                                                                                                                                                                                                                                                                                                                                                                                                                                                                                                                                                                                                                                                                                                                                                                                                                                                                                                                                                                                                                                                                                             |                      |            |                            |                       |                                 |     |                              |     |                           |                             |           |     |                          |     |                            |                                 |                                     |     |                            |     |           |                                    |                    |     |                                   |     |     |                              |     |     |                                    |     |     |                                                 |     |     |                                         |     |     |                    |  |    |           |  |  |                         |  |     |
| <b>DIFFICULTY BREATHING</b> .....               | .08                                                                                                                                  | .08                                                                                                                                                                                                                                                                                                                                                                                                                                                                                                                                                                                                                                                                                                                                                                                                                                                                                                                                                                                                                                                                                                                                                                                                                                                                                                                                                                                                                                                                                                                                                                                                                                                                                                                                                                                                                                                                                                                                                                                                                                                                                                                                                                                             |                      |            |                            |                       |                                 |     |                              |     |                           |                             |           |     |                          |     |                            |                                 |                                     |     |                            |     |           |                                    |                    |     |                                   |     |     |                              |     |     |                                    |     |     |                                                 |     |     |                                         |     |     |                    |  |    |           |  |  |                         |  |     |
| <b>SEVERE WEAKNESS</b> .....                    | .09                                                                                                                                  | .09                                                                                                                                                                                                                                                                                                                                                                                                                                                                                                                                                                                                                                                                                                                                                                                                                                                                                                                                                                                                                                                                                                                                                                                                                                                                                                                                                                                                                                                                                                                                                                                                                                                                                                                                                                                                                                                                                                                                                                                                                                                                                                                                                                                             |                      |            |                            |                       |                                 |     |                              |     |                           |                             |           |     |                          |     |                            |                                 |                                     |     |                            |     |           |                                    |                    |     |                                   |     |     |                              |     |     |                                    |     |     |                                                 |     |     |                                         |     |     |                    |  |    |           |  |  |                         |  |     |
| <b>SEVERE ABDOMINAL PAIN</b> .....              | .10                                                                                                                                  | .10                                                                                                                                                                                                                                                                                                                                                                                                                                                                                                                                                                                                                                                                                                                                                                                                                                                                                                                                                                                                                                                                                                                                                                                                                                                                                                                                                                                                                                                                                                                                                                                                                                                                                                                                                                                                                                                                                                                                                                                                                                                                                                                                                                                             |                      |            |                            |                       |                                 |     |                              |     |                           |                             |           |     |                          |     |                            |                                 |                                     |     |                            |     |           |                                    |                    |     |                                   |     |     |                              |     |     |                                    |     |     |                                                 |     |     |                                         |     |     |                    |  |    |           |  |  |                         |  |     |
| <b>ACCELERATED/REDUCED FETAL MOVEMENT</b> ..... | .11                                                                                                                                  | .11                                                                                                                                                                                                                                                                                                                                                                                                                                                                                                                                                                                                                                                                                                                                                                                                                                                                                                                                                                                                                                                                                                                                                                                                                                                                                                                                                                                                                                                                                                                                                                                                                                                                                                                                                                                                                                                                                                                                                                                                                                                                                                                                                                                             |                      |            |                            |                       |                                 |     |                              |     |                           |                             |           |     |                          |     |                            |                                 |                                     |     |                            |     |           |                                    |                    |     |                                   |     |     |                              |     |     |                                    |     |     |                                                 |     |     |                                         |     |     |                    |  |    |           |  |  |                         |  |     |
| <b>WATER BREAKS WITHOUT LABOR</b> .....         | .12                                                                                                                                  | .12                                                                                                                                                                                                                                                                                                                                                                                                                                                                                                                                                                                                                                                                                                                                                                                                                                                                                                                                                                                                                                                                                                                                                                                                                                                                                                                                                                                                                                                                                                                                                                                                                                                                                                                                                                                                                                                                                                                                                                                                                                                                                                                                                                                             |                      |            |                            |                       |                                 |     |                              |     |                           |                             |           |     |                          |     |                            |                                 |                                     |     |                            |     |           |                                    |                    |     |                                   |     |     |                              |     |     |                                    |     |     |                                                 |     |     |                                         |     |     |                    |  |    |           |  |  |                         |  |     |
| <b>OTHER</b> _____                              |                                                                                                                                      | 97                                                                                                                                                                                                                                                                                                                                                                                                                                                                                                                                                                                                                                                                                                                                                                                                                                                                                                                                                                                                                                                                                                                                                                                                                                                                                                                                                                                                                                                                                                                                                                                                                                                                                                                                                                                                                                                                                                                                                                                                                                                                                                                                                                                              |                      |            |                            |                       |                                 |     |                              |     |                           |                             |           |     |                          |     |                            |                                 |                                     |     |                            |     |           |                                    |                    |     |                                   |     |     |                              |     |     |                                    |     |     |                                                 |     |     |                                         |     |     |                    |  |    |           |  |  |                         |  |     |
| (SPECIFY)                                       |                                                                                                                                      |                                                                                                                                                                                                                                                                                                                                                                                                                                                                                                                                                                                                                                                                                                                                                                                                                                                                                                                                                                                                                                                                                                                                                                                                                                                                                                                                                                                                                                                                                                                                                                                                                                                                                                                                                                                                                                                                                                                                                                                                                                                                                                                                                                                                 |                      |            |                            |                       |                                 |     |                              |     |                           |                             |           |     |                          |     |                            |                                 |                                     |     |                            |     |           |                                    |                    |     |                                   |     |     |                              |     |     |                                    |     |     |                                                 |     |     |                                         |     |     |                    |  |    |           |  |  |                         |  |     |
| <b>DON'T KNOW</b> .....                         |                                                                                                                                      | .98                                                                                                                                                                                                                                                                                                                                                                                                                                                                                                                                                                                                                                                                                                                                                                                                                                                                                                                                                                                                                                                                                                                                                                                                                                                                                                                                                                                                                                                                                                                                                                                                                                                                                                                                                                                                                                                                                                                                                                                                                                                                                                                                                                                             |                      |            |                            |                       |                                 |     |                              |     |                           |                             |           |     |                          |     |                            |                                 |                                     |     |                            |     |           |                                    |                    |     |                                   |     |     |                              |     |     |                                    |     |     |                                                 |     |     |                                         |     |     |                    |  |    |           |  |  |                         |  |     |
| 37.                                             | Did you seek assistance for this problem?                                                                                            | <b>YES</b> .....01<br><b>NO</b> .....02<br><b>DON'T KNOW</b> .....98                                                                                                                                                                                                                                                                                                                                                                                                                                                                                                                                                                                                                                                                                                                                                                                                                                                                                                                                                                                                                                                                                                                                                                                                                                                                                                                                                                                                                                                                                                                                                                                                                                                                                                                                                                                                                                                                                                                                                                                                                                                                                                                            |                      |            |                            |                       |                                 |     |                              |     |                           |                             |           |     |                          |     |                            |                                 |                                     |     |                            |     |           |                                    |                    |     |                                   |     |     |                              |     |     |                                    |     |     |                                                 |     |     |                                         |     |     |                    |  |    |           |  |  |                         |  |     |
| 38.                                             | IF YES: Where did you get?<br><br>_____<br>(NAME OF PLACE)                                                                           | <table style="width: 100%; border-collapse: collapse;"> <tbody> <tr> <td colspan="2"><b>PUBLIC SECTOR</b></td> </tr> <tr> <td><b>GVT. HOSPITAL</b>.....</td> <td style="text-align: center;">.21</td> </tr> <tr> <td><b>GVT. HEALTH CENTER</b>.....</td> <td style="text-align: center;">.22</td> </tr> <tr> <td><b>GVT. DISPENSARY</b>.....</td> <td style="text-align: center;">.23</td> </tr> <tr> <td><b>OTHER PUBLIC</b> _____</td> <td style="text-align: center;">26</td> </tr> <tr> <td style="text-align: center;">(SPECIFY)</td> <td></td> </tr> <tr> <td colspan="2"><b>PRIVATE SECTOR</b></td> </tr> <tr> <td><b>PVT. HOSPITAL</b>.....</td> <td style="text-align: center;">.31</td> </tr> <tr> <td><b>MATERNITY/NURSING HOME</b>.....</td> <td style="text-align: center;">.32</td> </tr> <tr> <td><b>OTHER PRIVATE</b> _____</td> <td style="text-align: center;">36</td> </tr> <tr> <td style="text-align: center;">(SPECIFY)</td> <td></td> </tr> <tr> <td><b>OTHER</b> _____</td> <td style="text-align: center;">97</td> </tr> <tr> <td style="text-align: center;">(SPECIFY)</td> <td></td> </tr> </tbody> </table>                                                                                                                                                                                                                                                                                                                                                                                                                                                                                                                                                                                                                                                                                                                                                                                                                                                                                                                                                                                                                                                         | <b>PUBLIC SECTOR</b> |            | <b>GVT. HOSPITAL</b> ..... | .21                   | <b>GVT. HEALTH CENTER</b> ..... | .22 | <b>GVT. DISPENSARY</b> ..... | .23 | <b>OTHER PUBLIC</b> _____ | 26                          | (SPECIFY) |     | <b>PRIVATE SECTOR</b>    |     | <b>PVT. HOSPITAL</b> ..... | .31                             | <b>MATERNITY/NURSING HOME</b> ..... | .32 | <b>OTHER PRIVATE</b> _____ | 36  | (SPECIFY) |                                    | <b>OTHER</b> _____ | 97  | (SPECIFY)                         |     |     |                              |     |     |                                    |     |     |                                                 |     |     |                                         |     |     |                    |  |    |           |  |  |                         |  |     |
| <b>PUBLIC SECTOR</b>                            |                                                                                                                                      |                                                                                                                                                                                                                                                                                                                                                                                                                                                                                                                                                                                                                                                                                                                                                                                                                                                                                                                                                                                                                                                                                                                                                                                                                                                                                                                                                                                                                                                                                                                                                                                                                                                                                                                                                                                                                                                                                                                                                                                                                                                                                                                                                                                                 |                      |            |                            |                       |                                 |     |                              |     |                           |                             |           |     |                          |     |                            |                                 |                                     |     |                            |     |           |                                    |                    |     |                                   |     |     |                              |     |     |                                    |     |     |                                                 |     |     |                                         |     |     |                    |  |    |           |  |  |                         |  |     |
| <b>GVT. HOSPITAL</b> .....                      | .21                                                                                                                                  |                                                                                                                                                                                                                                                                                                                                                                                                                                                                                                                                                                                                                                                                                                                                                                                                                                                                                                                                                                                                                                                                                                                                                                                                                                                                                                                                                                                                                                                                                                                                                                                                                                                                                                                                                                                                                                                                                                                                                                                                                                                                                                                                                                                                 |                      |            |                            |                       |                                 |     |                              |     |                           |                             |           |     |                          |     |                            |                                 |                                     |     |                            |     |           |                                    |                    |     |                                   |     |     |                              |     |     |                                    |     |     |                                                 |     |     |                                         |     |     |                    |  |    |           |  |  |                         |  |     |
| <b>GVT. HEALTH CENTER</b> .....                 | .22                                                                                                                                  |                                                                                                                                                                                                                                                                                                                                                                                                                                                                                                                                                                                                                                                                                                                                                                                                                                                                                                                                                                                                                                                                                                                                                                                                                                                                                                                                                                                                                                                                                                                                                                                                                                                                                                                                                                                                                                                                                                                                                                                                                                                                                                                                                                                                 |                      |            |                            |                       |                                 |     |                              |     |                           |                             |           |     |                          |     |                            |                                 |                                     |     |                            |     |           |                                    |                    |     |                                   |     |     |                              |     |     |                                    |     |     |                                                 |     |     |                                         |     |     |                    |  |    |           |  |  |                         |  |     |
| <b>GVT. DISPENSARY</b> .....                    | .23                                                                                                                                  |                                                                                                                                                                                                                                                                                                                                                                                                                                                                                                                                                                                                                                                                                                                                                                                                                                                                                                                                                                                                                                                                                                                                                                                                                                                                                                                                                                                                                                                                                                                                                                                                                                                                                                                                                                                                                                                                                                                                                                                                                                                                                                                                                                                                 |                      |            |                            |                       |                                 |     |                              |     |                           |                             |           |     |                          |     |                            |                                 |                                     |     |                            |     |           |                                    |                    |     |                                   |     |     |                              |     |     |                                    |     |     |                                                 |     |     |                                         |     |     |                    |  |    |           |  |  |                         |  |     |
| <b>OTHER PUBLIC</b> _____                       | 26                                                                                                                                   |                                                                                                                                                                                                                                                                                                                                                                                                                                                                                                                                                                                                                                                                                                                                                                                                                                                                                                                                                                                                                                                                                                                                                                                                                                                                                                                                                                                                                                                                                                                                                                                                                                                                                                                                                                                                                                                                                                                                                                                                                                                                                                                                                                                                 |                      |            |                            |                       |                                 |     |                              |     |                           |                             |           |     |                          |     |                            |                                 |                                     |     |                            |     |           |                                    |                    |     |                                   |     |     |                              |     |     |                                    |     |     |                                                 |     |     |                                         |     |     |                    |  |    |           |  |  |                         |  |     |
| (SPECIFY)                                       |                                                                                                                                      |                                                                                                                                                                                                                                                                                                                                                                                                                                                                                                                                                                                                                                                                                                                                                                                                                                                                                                                                                                                                                                                                                                                                                                                                                                                                                                                                                                                                                                                                                                                                                                                                                                                                                                                                                                                                                                                                                                                                                                                                                                                                                                                                                                                                 |                      |            |                            |                       |                                 |     |                              |     |                           |                             |           |     |                          |     |                            |                                 |                                     |     |                            |     |           |                                    |                    |     |                                   |     |     |                              |     |     |                                    |     |     |                                                 |     |     |                                         |     |     |                    |  |    |           |  |  |                         |  |     |
| <b>PRIVATE SECTOR</b>                           |                                                                                                                                      |                                                                                                                                                                                                                                                                                                                                                                                                                                                                                                                                                                                                                                                                                                                                                                                                                                                                                                                                                                                                                                                                                                                                                                                                                                                                                                                                                                                                                                                                                                                                                                                                                                                                                                                                                                                                                                                                                                                                                                                                                                                                                                                                                                                                 |                      |            |                            |                       |                                 |     |                              |     |                           |                             |           |     |                          |     |                            |                                 |                                     |     |                            |     |           |                                    |                    |     |                                   |     |     |                              |     |     |                                    |     |     |                                                 |     |     |                                         |     |     |                    |  |    |           |  |  |                         |  |     |
| <b>PVT. HOSPITAL</b> .....                      | .31                                                                                                                                  |                                                                                                                                                                                                                                                                                                                                                                                                                                                                                                                                                                                                                                                                                                                                                                                                                                                                                                                                                                                                                                                                                                                                                                                                                                                                                                                                                                                                                                                                                                                                                                                                                                                                                                                                                                                                                                                                                                                                                                                                                                                                                                                                                                                                 |                      |            |                            |                       |                                 |     |                              |     |                           |                             |           |     |                          |     |                            |                                 |                                     |     |                            |     |           |                                    |                    |     |                                   |     |     |                              |     |     |                                    |     |     |                                                 |     |     |                                         |     |     |                    |  |    |           |  |  |                         |  |     |
| <b>MATERNITY/NURSING HOME</b> .....             | .32                                                                                                                                  |                                                                                                                                                                                                                                                                                                                                                                                                                                                                                                                                                                                                                                                                                                                                                                                                                                                                                                                                                                                                                                                                                                                                                                                                                                                                                                                                                                                                                                                                                                                                                                                                                                                                                                                                                                                                                                                                                                                                                                                                                                                                                                                                                                                                 |                      |            |                            |                       |                                 |     |                              |     |                           |                             |           |     |                          |     |                            |                                 |                                     |     |                            |     |           |                                    |                    |     |                                   |     |     |                              |     |     |                                    |     |     |                                                 |     |     |                                         |     |     |                    |  |    |           |  |  |                         |  |     |
| <b>OTHER PRIVATE</b> _____                      | 36                                                                                                                                   |                                                                                                                                                                                                                                                                                                                                                                                                                                                                                                                                                                                                                                                                                                                                                                                                                                                                                                                                                                                                                                                                                                                                                                                                                                                                                                                                                                                                                                                                                                                                                                                                                                                                                                                                                                                                                                                                                                                                                                                                                                                                                                                                                                                                 |                      |            |                            |                       |                                 |     |                              |     |                           |                             |           |     |                          |     |                            |                                 |                                     |     |                            |     |           |                                    |                    |     |                                   |     |     |                              |     |     |                                    |     |     |                                                 |     |     |                                         |     |     |                    |  |    |           |  |  |                         |  |     |
| (SPECIFY)                                       |                                                                                                                                      |                                                                                                                                                                                                                                                                                                                                                                                                                                                                                                                                                                                                                                                                                                                                                                                                                                                                                                                                                                                                                                                                                                                                                                                                                                                                                                                                                                                                                                                                                                                                                                                                                                                                                                                                                                                                                                                                                                                                                                                                                                                                                                                                                                                                 |                      |            |                            |                       |                                 |     |                              |     |                           |                             |           |     |                          |     |                            |                                 |                                     |     |                            |     |           |                                    |                    |     |                                   |     |     |                              |     |     |                                    |     |     |                                                 |     |     |                                         |     |     |                    |  |    |           |  |  |                         |  |     |
| <b>OTHER</b> _____                              | 97                                                                                                                                   |                                                                                                                                                                                                                                                                                                                                                                                                                                                                                                                                                                                                                                                                                                                                                                                                                                                                                                                                                                                                                                                                                                                                                                                                                                                                                                                                                                                                                                                                                                                                                                                                                                                                                                                                                                                                                                                                                                                                                                                                                                                                                                                                                                                                 |                      |            |                            |                       |                                 |     |                              |     |                           |                             |           |     |                          |     |                            |                                 |                                     |     |                            |     |           |                                    |                    |     |                                   |     |     |                              |     |     |                                    |     |     |                                                 |     |     |                                         |     |     |                    |  |    |           |  |  |                         |  |     |
| (SPECIFY)                                       |                                                                                                                                      |                                                                                                                                                                                                                                                                                                                                                                                                                                                                                                                                                                                                                                                                                                                                                                                                                                                                                                                                                                                                                                                                                                                                                                                                                                                                                                                                                                                                                                                                                                                                                                                                                                                                                                                                                                                                                                                                                                                                                                                                                                                                                                                                                                                                 |                      |            |                            |                       |                                 |     |                              |     |                           |                             |           |     |                          |     |                            |                                 |                                     |     |                            |     |           |                                    |                    |     |                                   |     |     |                              |     |     |                                    |     |     |                                                 |     |     |                                         |     |     |                    |  |    |           |  |  |                         |  |     |

| Q. # | QUESTION                                                                                                                                 | CODES                                                                                                                                                                                                                                                                                                                                                                                                                                                       |
|------|------------------------------------------------------------------------------------------------------------------------------------------|-------------------------------------------------------------------------------------------------------------------------------------------------------------------------------------------------------------------------------------------------------------------------------------------------------------------------------------------------------------------------------------------------------------------------------------------------------------|
| 39.  | Why did you not seek assistance for this problem?<br><br>Anything else?<br><br>PROBE FOR OTHER REASONS AND RECORD ALL REASONS MENTIONED. | <b>RESP. DIDN'T THINK NECESSARY.....01</b><br><b>HUSBAND /FAMILY DIDN'T THINK NECESSARY.....02</b><br><b>FACILITY TOO FAR.....03</b><br><b>NOT TRANSPORT.....04</b><br><b>NO CHILDCARE.....05</b><br><b>TOO EXPENSIVE.....06</b><br><b>SERVICES ARE POOR.....07</b><br><b>USED HOME REMEDY.....08</b><br><b>DID NOT KNOW WHERE TO GO.....09</b><br><b>NO TIME TO GO.....10</b><br><br><b>OTHER _____ 97</b><br><b>(SPECIFY)</b><br><b>DON'T KNOW.....98</b> |
| 40.  | Who made the final decision about whether or not to seek assistance for this problem?                                                    | <b>NO ONE.....01</b><br><b>RESPONDENT.....02</b><br><b>RESPONDENT &amp; HUSBAND.....03</b><br><b>HUSBAND.....04</b><br><b>RESP'S MOTHER.....05</b><br><b>RESP'S FATHER.....06</b><br><b>MOTHER IN LAW.....07</b><br><b>FATHER IN LAW.....08</b><br><b>FRIEND/NEIGHBOUR.....09</b><br><b>HEALTH PROFESSIONAL.....10</b><br><b>TBA.....11</b><br><br><b>OTHER _____ 97</b><br><b>(SPECIFY)</b><br><b>DON'T KNOW.....98</b>                                    |

**PART 5: PERSONAL EXPERIENCE RELATED TO LAST BIRTH.**

| Q. # | QUESTION                                                                                                                                                          | CODES                                                                                                                                                                                                                                                                                                                                                                                             |
|------|-------------------------------------------------------------------------------------------------------------------------------------------------------------------|---------------------------------------------------------------------------------------------------------------------------------------------------------------------------------------------------------------------------------------------------------------------------------------------------------------------------------------------------------------------------------------------------|
| 41.  | Where did you give birth to your last child?<br><br>_____<br>( NAME OF PLACE )                                                                                    | <b>HOME</b><br>RESPONDENT'S HOME.....11<br>TBA'S HOME.....12<br>OTHER HOME.....13<br><br><b>PUBLIC SECTOR</b><br>GVT. HOSPITAL.....21<br>GVT. HEALTH CENTER.....22<br>GVT. DISPENSARY.....23<br>OTHERPUBLIC _____ 26<br>(SPECIFY)<br><br><b>PRIVATE SECTOR</b><br>PVT. HOSPITAL.....31<br>MATERNITY/NURSING HOME.....32<br>OTHER PRIVATE _____ 36<br>(SPECIFY)<br><br>OTHER _____ 97<br>(SPECIFY) |
| 42.  | Did you plan to give birth at this place?                                                                                                                         | YES.....01<br>NO.....02<br>DON'T KNOW.....98                                                                                                                                                                                                                                                                                                                                                      |
| 43.  | Prior to this birth, did you or your family make any arrangements for the birth of this child?                                                                    | YES.....01<br>NO.....02<br>DON'T KNOW.....98                                                                                                                                                                                                                                                                                                                                                      |
| 44.  | Which arrangements did you or your family make for the birth of this child?<br>(CIRCLE ALL RESPONSES GIVEN.)<br>THEN PROBE: Did you [ANY REMAINING ARRANGEMENTS]? | UNPROMPTED    PROMPTED<br><b>IDENTIFY</b><br>TRANSPORT.....01.....01<br><b>SAVE MONEY</b><br>(for emergencies)..... 01.....02<br><b>IDENTIFY BLOOD</b><br>DONOR.....03.....03<br><b>IDENTIFY SKILLED</b><br>PROVIDER.....04.....04<br><b>IDENTIFY</b><br>WHERE TO GO .....05.....05<br>BIRTH KIT.....06.....06<br>OTHER _____ 97<br>(SPECIFY)                                                     |
| 45.  | Did you use the mode of transport that you identified?                                                                                                            | YES.....01<br>NO.....02<br>DON'T KNOW.....98                                                                                                                                                                                                                                                                                                                                                      |
| 46.  | Did you use the money saved for pregnancies emergencies or child emergencies?                                                                                     | YES.....01<br>NO.....02<br>DON'T KNOW.....98                                                                                                                                                                                                                                                                                                                                                      |
| 47.  | Did you use the blood donor you identified                                                                                                                        | YES.....01<br>NO.....02<br>DON'T KNOW.....98                                                                                                                                                                                                                                                                                                                                                      |

|     |                                                                                                                                |                                                                                                                                                                                                                                                                                                                                                                                                                                                                                        |
|-----|--------------------------------------------------------------------------------------------------------------------------------|----------------------------------------------------------------------------------------------------------------------------------------------------------------------------------------------------------------------------------------------------------------------------------------------------------------------------------------------------------------------------------------------------------------------------------------------------------------------------------------|
| 48. | How did you go to the health facility?<br>PROBE: What type of transportation did you mainly use to get to the health facility? | <b>AMBULANCE.....01</b><br><b>PRIVATE CAR.....02</b><br><b>TAXI/BUS.....03</b><br><b>CART.....04</b><br><b>MOTORBIKE.....05</b><br><b>ON FOOT .....06</b><br><b>BICYCLE.....07</b><br><b>OTHER _____ 97</b><br><b>(SPECIFY)</b><br><b>DON'T KNOW .....98</b>                                                                                                                                                                                                                           |
| 49. | Who accompanied you to the place where you gave birth?<br>PROBE FOR THE PERSON(S) ACCOMPANYING AND RECORD ALL PERSONS.         | <b>NO ONE.....01</b><br><b>HUSBAND.....02</b><br><b>RESP.'S MOTHER.....03</b><br><b>RESP.'S FATHER.....04</b><br><b>MOTHER-IN-LAW.....05</b><br><b>FATHER-IN-LAW .....06</b><br><b>SISTER/SISTER-IN-LAW.....07</b><br><b>OTHER MEMBER OF RESP.'S FAM.....08</b><br><b>OTHER MEMBER OF HUSB.'S FAM .....09</b><br><b>FRIEND/NEIGHBOR.....10</b><br><b>COMMUNITY HEALTH WORKER.....11</b><br><b>TBA.....12</b><br><b>OTHER _____ 97</b><br><b>(SPECIFY)</b><br><b>DON'T KNOW .....98</b> |
| 50. | Can you tell me why you did not give birth in a health facility                                                                | <b>RESP. DIDN'T THINK NECESSARY.....01</b><br><b>HUSBAND/FAMILY DIDN'T THINK NECESSARY.....02</b><br><b>FACILITY TOO FAR.....03</b><br><b>NO TRANSPORT.....04</b><br><b>NO CHILDCARE.....05</b><br><b>TOO EXPENSIVE.....06</b><br><b>SERVICES ARE POOR.....07</b><br><b>DID NOT KNOW WHERE TO GO.....08</b><br><b>NO TIME TO GO.....09</b><br><b>OTHER _____ 97</b><br><b>(SPECIFY)</b><br><b>DON'T KNOW .....98</b>                                                                   |
| 51. | Who assisted with the birth?                                                                                                   | <b>HEALTH PROFESSIONAL.....01</b><br><b>TBA.....02</b><br><b>COMMUNITY HEALTH WORKER.....03</b><br><b>RELATIVE/FRIEND .....04</b><br><b>OTHER _____ 97</b><br><b>(SPECIFY)</b>                                                                                                                                                                                                                                                                                                         |
| 52. | Have you seen, heard or read any information regarding birth preparedness in the past six months                               | <b>YES .....01</b><br><b>NO.....02</b><br><b>DON'T REMEMBER.....98</b>                                                                                                                                                                                                                                                                                                                                                                                                                 |
| 53. | From which source did you see hear or read about birth preparedness?<br>(CIRCLE ALL RESPONSES GIVEN)                           | <b>RADIO.....01</b><br><b>TV.....02</b><br><b>WRITTEN SOURCES.....03</b><br><b>INTERPERSONAL SOURCES.....04</b><br><b>OTHER _____ 97</b><br><b>(SPECIFY)</b><br><b>DON'T REMEMBER.....98</b>                                                                                                                                                                                                                                                                                           |

|     |                                                                                                        |                                                                                                                                         |
|-----|--------------------------------------------------------------------------------------------------------|-----------------------------------------------------------------------------------------------------------------------------------------|
| 54. | Have you participated in any community activities related to birth preparedness in the past six months | <b>YES</b> .....01<br><b>NO</b> .....02<br><b>DON'T REMEMBER</b> .....98                                                                |
| 55. | Through which activities did you hear about birth preparedness(CIRCLE ALL RESPONSES GIVEN)             | <b>STREET DRAMA</b> .....01<br><b>COMMUNITY MEETINGS</b> .....02<br><b>MOTHER'S GROUPS</b> .....03<br><b>OTHER</b> _____97<br>(SPECIFY) |
